# Supplementary material for: Microphysical and radiative effects of aerosols on warm clouds during the Amazon biomass burning season as observed by MODIS: impacts of water vapor and land cover
Source: Copernicus journal article supplement (doi:10.5194/acp-11-3021-2011), 2011-04-01

# Supplementary Material for the ACP Manuscript, “Microphysical and radiative effects of aerosols on warm clouds during the Amazon biomass burning season as observed by MODIS: impacts of water vapor and land cover”

J. E. Ten Hoeve<sup>1</sup>, L. A. Remer<sup>2</sup>, and M. Z. Jacobson<sup>1</sup>

[1]{Department of Civil and Environmental Engineering, Stanford University, CA, USA}

[2]{NASA Goddard Space Flight Center, Greenbelt, MD, USA}

Correspondence to: J. E. Ten Hoeve (tenhoeve@stanford.edu)

**S.1** The number of retrievals included in each bin of each plot in Figure 3. Bin 1 corresponds to the leftmost bin and bin 8 corresponds to the rightmost bin.

| Panel | Variable              | Bin Number |       |      |      |      |      |      |      |
|-------|-----------------------|------------|-------|------|------|------|------|------|------|
|       |                       | 1          | 2     | 3    | 4    | 5    | 6    | 7    | 8    |
| a     | Column Water Vapor    | 46666      | 23499 | 6433 | 6489 | 4464 | 4692 | 4456 | 3687 |
| a     | Cloud Fraction        | 33570      | 16363 | 3857 | 3866 | 2664 | 3293 | 3603 | 2924 |
| b     | Aerosol Optical Depth | 46679      | 23522 | 6512 | 6515 | 4645 | 5198 | 5063 | 4341 |

**S.2** Frequency distributions of variables shown in Table 1 for both forest and pasture. The generally lower frequencies for the pasture reflect the smaller area of pasture in our study region (see Figure 1). A two-sample Kolmogorov-Smirnov goodness of fit test was performed on each variable to examine if forest and pasture data were sampled from the same underlying distribution. The test makes no assumption about the underlying distribution of the data. We find that for all variables, the forest and pasture data are not sampled from the same underlying distribution at the 99% confidence interval according to a two-tailed test, thus suggesting the forest and pasture distributions are statistically different for each variable.

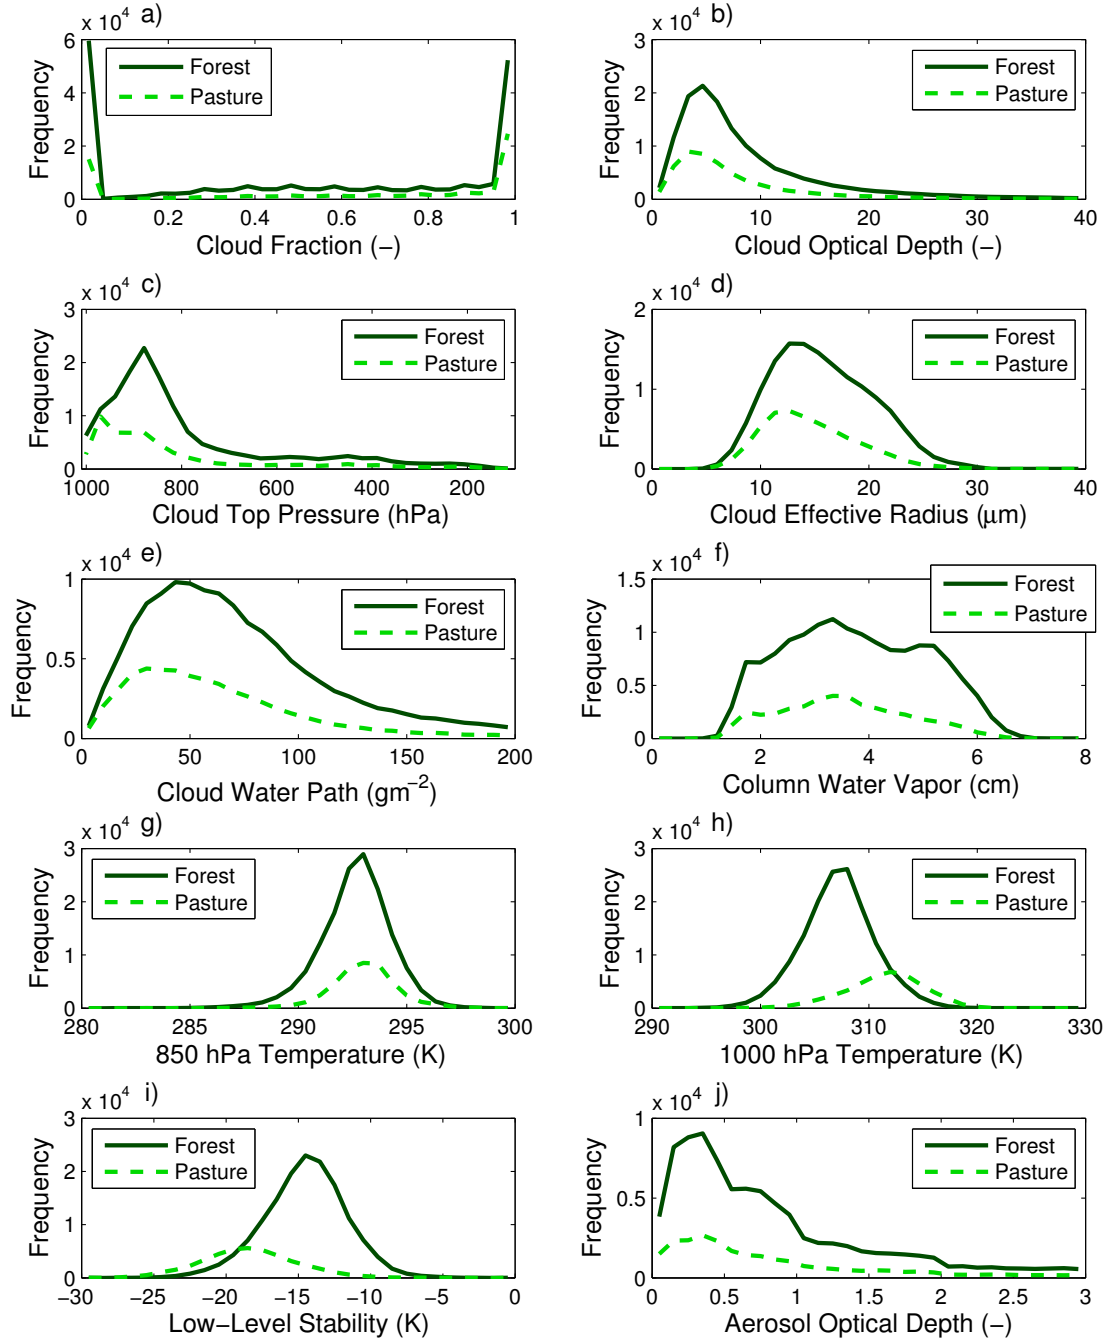

Supplement: Supplementary file 1 [file acp-11-3021-2011-supplement.pdf]
